# Supplementary material for: Pre-mitotic genome re-organisation bookends the B cell differentiation process
Source: PubMed Central journal article supplement (PMC7910489; doi:10.1038/s41467-021-21536-2), 2021-02-26
Supplement: 41467_2021_21536_MOESM3_ESM.pdf [file 41467_2021_21536_MOESM3_ESM.pdf]

## **Description of Additional Supplementary Files**

### **Supplementary Data 1**

In situ HiC library statistics

### **Supplementary Data 2**

Differentially expressed genes across B cell differentiation

### **Supplementary Data 3**

Differential interactions across B cell differentiation

### **Supplementary Data 4**

Pre-existing loop structure and gene expression changes three hours after activation

### **Supplementary Data 5**

Gene ontology of differentially expressed genes across B cell differentiation

### **Supplementary Data 6**

A/B compartment changes across B cell differentiation

### **Supplementary Data 7**

Differential interactions at promoters (DIPs) across B cell differentiation

### **Supplementary Data 8**

Patterns of change in differential interactions at promoters (DIPs) across B cell differentiation

### **Supplementary Data 9**

Gene ontology of DIPs across B cell differentiation

### **Supplementary Data 10**

Gene ontology of DIP patterns across B cell differentiation

### **Supplementary Data 11**

Motif analysis within differentially interacting promoters

### **Supplementary Data 12**

Differential interactions across B cell differentiation, including Pre-S phase population

### **Supplementary Data 13**

Antibodies used in the study
